# Supplementary material for: Human Papillomavirus Infection and the Risk of Erectile Dysfunction: A Nationwide Population-Based Matched Cohort Study
Source: MDPI journal article supplement (doi:10.3390/jpm12050699), 2022-04-27
Supplement: s1 [file s1]

Supplement Table S1. Baseline characteristic in sensitivity analysis (excluding participants with cancer and stroke on the index date)

|                         |  | Non-HPV<br>(N=46708) |        | HPV<br>(N=11677) |        |       |
|-------------------------|--|----------------------|--------|------------------|--------|-------|
| Variables               |  | n                    | %      | n                | %      | SMD   |
| Age, year               |  |                      |        |                  |        |       |
| 18-30                   |  | 19217                | 41%    | 4784             | 41%    | 0.004 |
| 31-40                   |  | 10367                | 22%    | 2554             | 22%    | 0.008 |
| 41-50                   |  | 8907                 | 19%    | 2173             | 19%    | 0.01  |
| >=51                    |  | 8217                 | 18%    | 2166             | 19%    | 0.03  |
| mean, (SD)              |  | 36.6                 | (13.9) | 36.8             | (14.4) | 0.02  |
| Comorbidities           |  |                      |        |                  |        |       |
| Hypertension            |  | 6330                 | 14%    | 1603             | 14%    | 0.005 |
| diabetes mellitus       |  | 2897                 | 6%     | 763              | 7%     | 0.01  |
| Hyperlipidemia          |  | 6948                 | 15%    | 1740             | 15%    | 0.001 |
| CAD                     |  | 296                  | 0.6%   | 99               | 0.8%   | 0.03  |
| CKD                     |  | 235                  | 0.5%   | 91               | 0.8%   | 0.04  |
| COPD                    |  | 3232                 | 6.9%   | 881              | 7.5%   | 0.02  |
| Alcohol-related illness |  | 1426                 | 3.1%   | 365              | 3.1%   | 0.004 |
| HIV                     |  | 104                  | 0.2%   | 30               | 0.3%   | 0.007 |
| Medication              |  |                      |        |                  |        |       |
| a-blocker               |  | 4030                 | 9%     | 1143             | 10%    | 0.04  |
| b-blocker               |  | 2310                 | 5%     | 628              | 5%     | 0.02  |
| CCB                     |  | 6178                 | 13%    | 1587             | 14%    | 0.01  |
| Diuretics               |  | 3708                 | 8%     | 978              | 8%     | 0.02  |

SMD: standard mean difference;

CAD: cardiovascular disease; CKD: chronic kidney disease; COPD: chronic obstructive pulmonary disease;

HIV: human immunodeficiency virus; AID: Autoimmune disease; CCB: calcium channel blocker.

Supplement Table S2. Sensitivity analysis (excluding participants with cancer and stroke on the index date)

| Variables | Erectile dysfunction |        |      |                  | aHR        |               |
|-----------|----------------------|--------|------|------------------|------------|---------------|
|           | n                    | PY     | IR   | cHR (95% CI)     | I (95% CI) |               |
| non-HPV   | 332                  | 251972 | 1.32 | 1.00 -           | 1.00       | -             |
| HPV       | 135                  | 63016  | 2.14 | 1.64 (1.34,2)*** | 1.59       | (1.3,1.95)*** |
| Age, year |                      |        |      |                  |            |               |
| 18-30     | 57                   | 136895 | 0.42 | 1.00 -           | 1.00       | -             |

|                         |     |        |      |      |                |      |                |
|-------------------------|-----|--------|------|------|----------------|------|----------------|
| 31-40                   | 80  | 70296  | 1.14 | 2.74 | (1.95,3.86)*** | 2.41 | (1.71,3.39)*** |
| 41-50                   | 148 | 58493  | 2.53 | 6.12 | (4.51,8.31)*** | 4.16 | (3.02,5.72)*** |
| >=51                    | 182 | 49304  | 3.69 | 9.03 | (6.7,12.16)*** | 3.90 | (2.75,5.53)*** |
| Comorbidities           |     |        |      |      |                |      |                |
| hypertension            |     |        |      |      |                |      |                |
| No                      | 344 | 276908 | 1.24 | 1.00 | -              | 1.00 | -              |
| Yes                     | 123 | 38080  | 3.23 | 2.62 | (2.13,3.22)*** | 0.84 | (0.63,1.12)    |
| diabetes mellitus       |     |        |      |      |                |      |                |
| No                      | 389 | 297492 | 1.31 | 1.00 | -              | 1.00 | -              |
| Yes                     | 78  | 17496  | 4.46 | 3.43 | (2.69,4.37)*** | 1.27 | (0.97,1.67)    |
| hyperlipidemia          |     |        |      |      |                |      |                |
| No                      | 301 | 271359 | 1.11 | 1.00 | -              | 1.00 | -              |
| Yes                     | 166 | 43629  | 3.80 | 3.43 | (2.84,4.15)*** | 1.49 | (1.19,1.86)*** |
| CAD                     |     |        |      |      |                |      |                |
| No                      | 463 | 313188 | 1.48 | 1.00 | -              |      |                |
| Yes                     | 4   | 1800   | 2.22 | 1.50 | (0.56,4.02)    |      |                |
| CKD                     |     |        |      |      |                |      |                |
| No                      | 463 | 313719 | 1.48 | 1.00 | -              |      |                |
| Yes                     | 4   | 1269   | 3.15 | 2.18 | (0.81,5.84)    |      |                |
| COPD                    |     |        |      |      |                |      |                |
| No                      | 410 | 293826 | 1.40 | 1.00 | -              | 1.00 | -              |
| Yes                     | 57  | 21162  | 2.69 | 1.93 | (1.46,2.55)*** | 0.87 | (0.65,1.16)    |
| Alcohol-related illness |     |        |      |      |                |      |                |
| No                      | 444 | 307251 | 1.45 | 1.00 | -              | 1.00 | -              |
| Yes                     | 23  | 7737   | 2.97 | 2.12 | (1.39,3.22)*** | 1.36 | (0.89,2.07)    |
| HIV                     |     |        |      |      |                |      |                |
| No                      | 467 | 314394 | 1.49 | 1.00 | -              |      |                |
| Yes                     | 0   | 594    | 0.00 | 0.00 | (0,Inf)        |      |                |
| Medication              |     |        |      |      |                |      |                |
| a-blocker               |     |        |      |      |                |      |                |
| No                      | 265 | 286129 | 0.93 | 1.00 | -              | 1.00 | -              |
| Yes                     | 202 | 28859  | 7.00 | 7.49 | (6.24,9)***    | 4.51 | (3.62,5.64)*** |
| b-blocker               |     |        |      |      |                |      |                |
| No                      | 406 | 298298 | 1.36 | 1.00 | -              | 1.00 | -              |
| Yes                     | 61  | 16690  | 3.65 | 2.63 | (2.01,3.45)*** | 1.22 | (0.9,1.65)     |
| CCB                     |     |        |      |      |                |      |                |
| No                      | 328 | 271942 | 1.21 | 1.00 | -              | 1.00 | -              |
| Yes                     | 139 | 43046  | 3.23 | 2.64 | (2.16,3.22)*** | 0.97 | (0.74,1.29)    |
| Diuretics               |     |        |      |      |                |      |                |
| No                      | 397 | 289830 | 1.37 | 1.00 | -              | 1.00 | -              |
| Yes                     | 70  | 25158  | 2.78 | 2.01 | (1.55,2.59)*** | 0.66 | (0.49,0.89)**  |

---

\*: p-value<0.05; \*\*: p-value<0.01; \*\*\*: p-value<0.001;

PY: person-years; IR: incidence rate per 1000 person-years; cHR: crude hazard ratio; aHR: adjusted hazard ratio;

CAD: cardiovascular disease; CKD: chronic kidney disease; COPD: chronic obstructive pulmonary disease; HIV: human immunodeficiency virus; AID: Autoimmune disease; CCB: calcium channel blocker; †: adjusted by age and hypertension, diabetes mellitus, hyperlipidemia, COPD, alcohol-related illness and all medication.

Supplement Table S3. Baseline characteristic in negative control analysis

| Variables               | Non-NTS<br>(N=3240) |        | NTS<br>(N=810) |        | p-value |
|-------------------------|---------------------|--------|----------------|--------|---------|
|                         | n                   | %      | n              | %      |         |
| Age, year               |                     |        |                |        | 0.83    |
| 18-30                   | 631                 | 19%    | 162            | 20%    |         |
| 31-40                   | 630                 | 19%    | 167            | 21%    |         |
| 41-50                   | 565                 | 17%    | 136            | 17%    |         |
| >=51                    | 1414                | 44%    | 345            | 43%    |         |
| mean, (SD)              | 48.1                | (18.3) | 48.0           | (18.8) | 0.89    |
| Comorbidities           |                     |        |                |        |         |
| hypertension            | 1036                | 32%    | 256            | 32%    | 0.87    |
| diabetes mellitus       | 539                 | 17%    | 140            | 17%    | 0.70    |
| hyperlipidemia          | 1070                | 33%    | 192            | 24%    | <0.001  |
| Stroke                  | 524                 | 16%    | 90             | 11%    | <0.001  |
| CAD                     | 105                 | 3%     | 25             | 3%     | 0.91    |
| CKD                     | 118                 | 4%     | 37             | 5%     | 0.26    |
| COPD                    | 702                 | 22%    | 166            | 20%    | 0.50    |
| Alcohol-related illness |                     |        |                |        |         |
| HIV                     | 218                 | 7%     | 68             | 8%     | 0.11    |
| AID                     | 60                  | 2%     | 15             | 2%     | 1.00    |
| AID                     | 93                  | 3%     | 28             | 3%     | 0.45    |
| Medication              |                     |        |                |        |         |
| a-blocker               | 999                 | 31%    | 227            | 28%    | 0.13    |
| b-blocker               | 523                 | 16%    | 125            | 15%    | 0.66    |
| CCB                     | 1463                | 45%    | 290            | 36%    | <0.001  |
| diuretics               | 1043                | 32%    | 255            | 31%    | 0.73    |

CAD: cardiovascular disease; CKD: chronic kidney disease; COPD: chronic obstructive pulmonary disease; HIV: human immunodeficiency virus; AID: Autoimmune disease; CCB: calcium channel blocker.  
 Supplement Table 4. Negative control analysis (NTS infection as the negative control exposure)

| Variables | Erectile dysfunction |       |      | cHR (95% CI)     | aHR (95% CI)     |
|-----------|----------------------|-------|------|------------------|------------------|
|           | n                    | PY    | IR   |                  |                  |
| non-NTS   | 48                   | 20892 | 2.30 | 1.00 -           | 1.00 -           |
| NTS       | 7                    | 5106  | 1.37 | 0.59 (0.27,1.31) | 0.69 (0.31,1.53) |
| Age, year |                      |       |      |                  |                  |
| 18-30     | 4                    | 5769  | 0.69 | 1.00 -           | 1.00 -           |

|                         |    |       |      |      |                |      |               |
|-------------------------|----|-------|------|------|----------------|------|---------------|
| 31-40                   | 9  | 5841  | 1.54 | 2.23 | (0.69,7.24)    | 1.59 | (0.48,5.27)   |
| 41-50                   | 13 | 4592  | 2.83 | 4.16 | (1.36,12.76)*  | 1.88 | (0.56,6.3)    |
| >=51                    | 29 | 9796  | 2.96 | 4.38 | (1.54,12.49)** | 1.22 | (0.35,4.31)   |
| Comorbidities           |    |       |      |      |                |      |               |
| hypertension            |    |       |      |      |                |      |               |
| No                      | 32 | 18918 | 1.69 | 1.00 | -              | 1.00 | -             |
| Yes                     | 23 | 7080  | 3.25 | 1.93 | (1.13,3.31)*   | 0.80 | (0.38,1.67)   |
| diabetes mellitus       |    |       |      |      |                |      |               |
| No                      | 41 | 22418 | 1.83 | 1.00 | -              | 1.00 | -             |
| Yes                     | 14 | 3580  | 3.91 | 2.20 | (1.2,4.04)*    | 1.08 | (0.54,2.16)   |
| hyperlipidemia          |    |       |      |      |                |      |               |
| No                      | 24 | 18515 | 1.30 | 1.00 | -              | 1.00 | -             |
| Yes                     | 31 | 7483  | 4.14 | 3.23 | (1.89,5.52)*** | 2.57 | (1.41,4.69)** |
| Stroke                  |    |       |      |      |                |      |               |
| No                      | 48 | 23324 | 2.06 | 1.00 | -              |      |               |
| Yes                     | 7  | 2674  | 2.62 | 1.30 | (0.59,2.89)    |      |               |
| CAD                     |    |       |      |      |                |      |               |
| No                      | 54 | 25413 | 2.12 | 1.00 | -              |      |               |
| Yes                     | 1  | 585   | 1.71 | 0.82 | (0.11,5.92)    |      |               |
| CKD                     |    |       |      |      |                |      |               |
| No                      | 54 | 25385 | 2.13 | 1.00 | -              |      |               |
| Yes                     | 1  | 613   | 1.63 | 0.79 | (0.11,5.72)    |      |               |
| COPD                    |    |       |      |      |                |      |               |
| No                      | 38 | 21165 | 1.80 | 1.00 | -              | 1.00 | -             |
| Yes                     | 17 | 4833  | 3.52 | 1.99 | (1.12,3.53)*   | 1.18 | (0.63,2.23)   |
| Alcohol-related illness |    |       |      |      |                |      |               |
| No                      | 50 | 24415 | 2.05 | 1.00 | -              |      |               |
| Yes                     | 5  | 1583  | 3.16 | 1.57 | (0.63,3.94)    |      |               |
| HIV                     |    |       |      |      |                |      |               |
| No                      | 54 | 25596 | 2.11 | 1.00 | -              |      |               |
| Yes                     | 1  | 401   | 2.49 | 1.17 | (0.16,8.46)    |      |               |
| AID                     |    |       |      |      |                |      |               |
| No                      | 51 | 25279 | 2.02 | 1.00 | -              | 1.00 | -             |
| Yes                     | 4  | 719   | 5.56 | 2.82 | (1.02,7.79)*   | 2.98 | (1.49,5.98)** |

|            |    |       |      |      |                |  |      |               |
|------------|----|-------|------|------|----------------|--|------|---------------|
| Medication |    |       |      |      |                |  |      |               |
| a-blocker  |    |       |      |      |                |  |      |               |
| No         | 22 | 18739 | 1.17 | 1.00 | -              |  | 1.00 | -             |
| Yes        | 33 | 7259  | 4.55 | 3.96 | (2.31,6.79)*** |  | 2.99 | (1.49,5.98)** |
| b-blocker  |    |       |      |      |                |  |      |               |
| No         | 42 | 21802 | 1.93 | 1.00 | -              |  |      |               |
| Yes        | 13 | 4196  | 3.10 | 1.62 | (0.87,3.01)    |  |      |               |
| CCB        |    |       |      |      |                |  |      |               |
| No         | 24 | 15109 | 1.59 | 1.00 | -              |  | 1.00 | -             |
| Yes        | 31 | 10889 | 2.85 | 1.81 | (1.06,3.08)*   |  | 0.68 | (0.34,1.37)   |
| diuretics  |    |       |      |      |                |  |      |               |
| No         | 25 | 18265 | 1.37 | 1.00 | -              |  | 1.00 | -             |
| Yes        | 30 | 7733  | 3.88 | 2.86 | (1.68,4.87)*** |  | 1.80 | (0.9,3.57)    |

\*: p-value<0.05; \*\*: p-value<0.01; \*\*\*: p-value<0.001;

PY: person-years; IR: incidence rate per 1000 person-years; cHR: crude hazard ratio; aHR: adjusted hazard ratio;

CAD: cardiovascular disease; CKD: chronic kidney disease; COPD: chronic obstruction pulmonary disease; HIV: human immunodeficiency virus; AID: Autoimmune disease; CCB: calcium channel blocker; I: adjusted by age and hypertension, diabetes mellitus, hyperlipidemia, COPD, AID, a-blocker, CCB and diuretics.
